# Supplementary material for: Novel Chain-End Modification of Polymer Iodides via Reversible Complexation-Mediated Polymerization with Functionalized Radical Generation Agents
Source: MDPI journal article supplement (doi:10.3390/polym15122667), 2023-06-13
Supplement: s1 [file s1]

# Supplementary Materials: Novel Chain-End Modification of Polymer Iodides via Reversible Complexation-Mediated Polymerization with Functionalized Radical Generation Agents

Kazuya Ohtani <sup>1</sup>, Kanta Shimizu <sup>1</sup>, Tatsuhiro Takahashi <sup>1</sup> and Masumi Takamura <sup>2,\*</sup>

<sup>1</sup> Department of Organic Materials Science, Graduated School of Organic Materials Science, Yamagata University, 4-3-16 Jonan, Yonezawa 992-8510, Japan; t221002m@st.yamagata-u.ac.jp (K.O.); smknt19981007@gmail.com (K.S.); effort@yz.yamagata-u.ac.jp (T.T.)

<sup>2</sup> Yamagata University Inkjet Development Center, 1- 808-48 Arcadia, Yonezawa 992-0119, Japan

\* Correspondence: masumi\_takamura@yz.yamagata-u.ac.jp

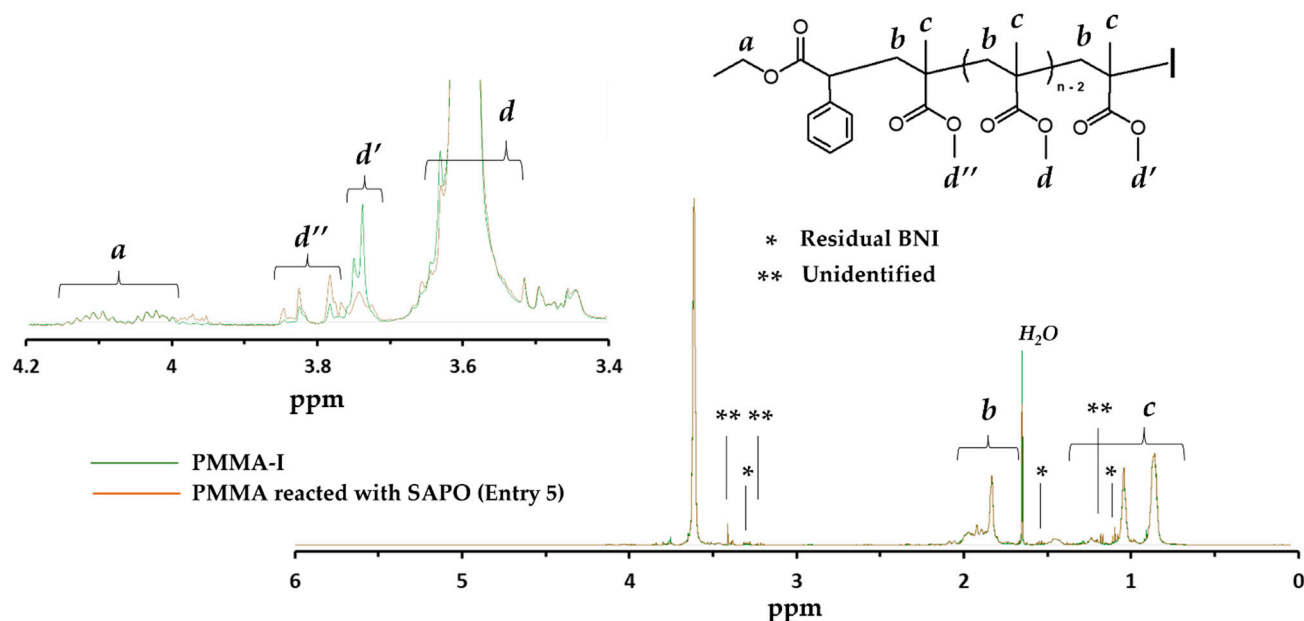

**Figure S1.** <sup>1</sup>H-NMR spectra of PMMA modified with SAPO (Entry 5) and PMMA-I (precursor).

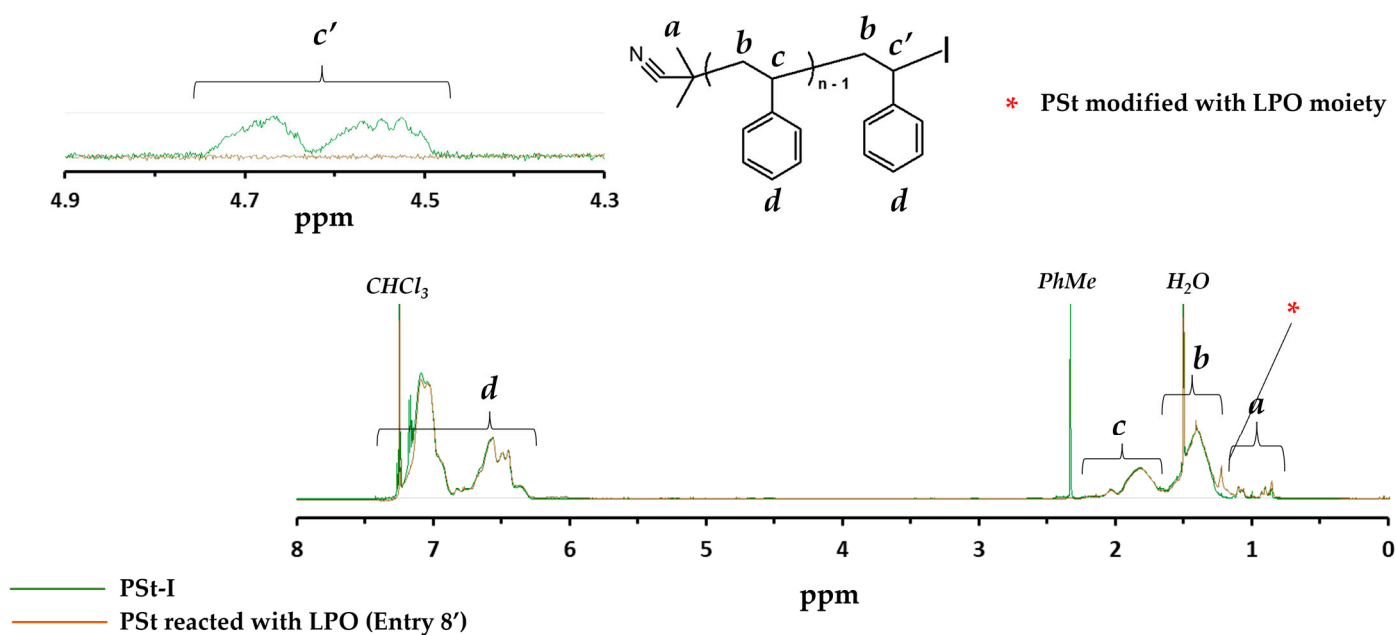

**Figure S2.** <sup>1</sup>H-NMR spectra of PSt modified with LPO (Entry 8') and PSt-I (precursor).

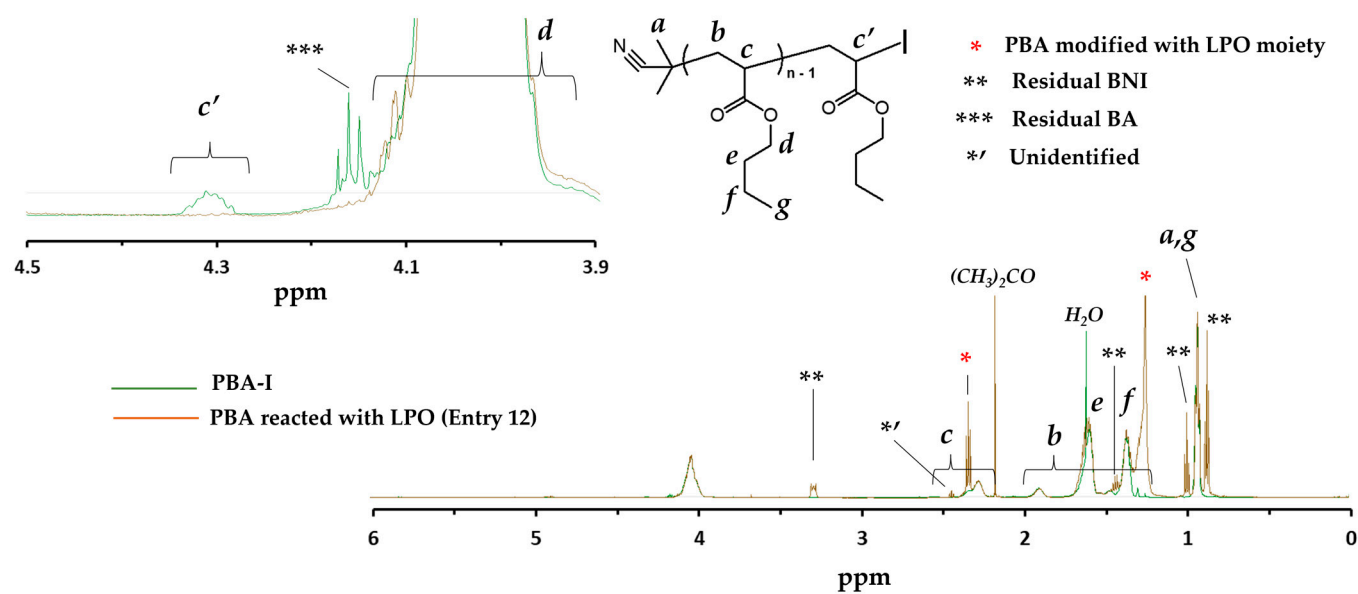

Figure S3.  $^1\text{H}$ -NMR spectra of PBA modified with LPO (Entry 12) and PBA-I (precursor).

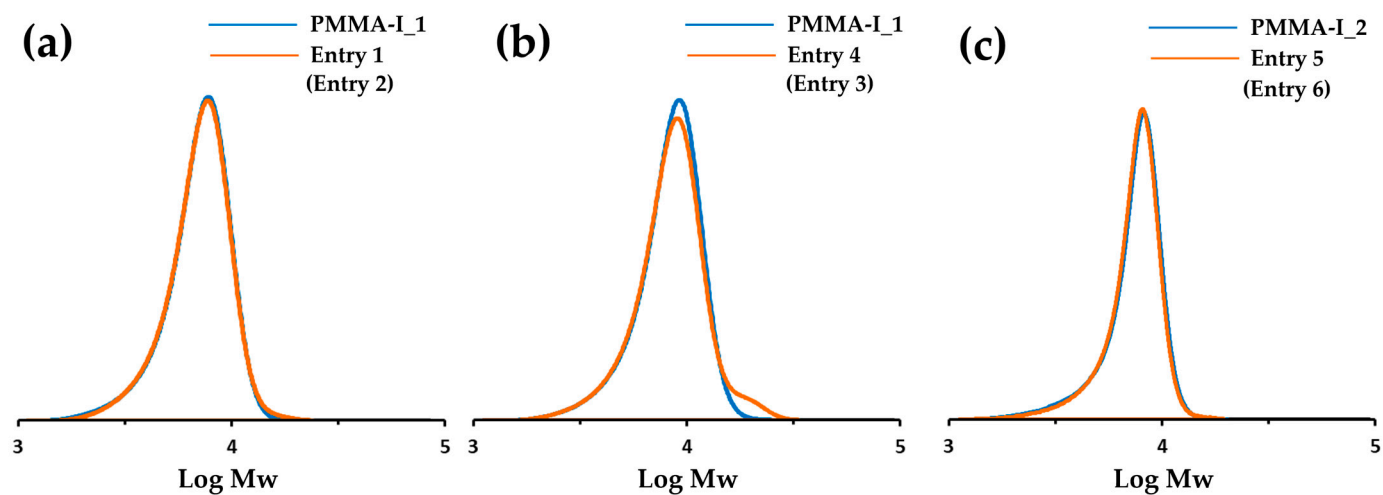

Figure S4. SEC chromatograms before and after chain-end modification for (a) Entry 1, (b) Entry 4, and (c) Entry 5.

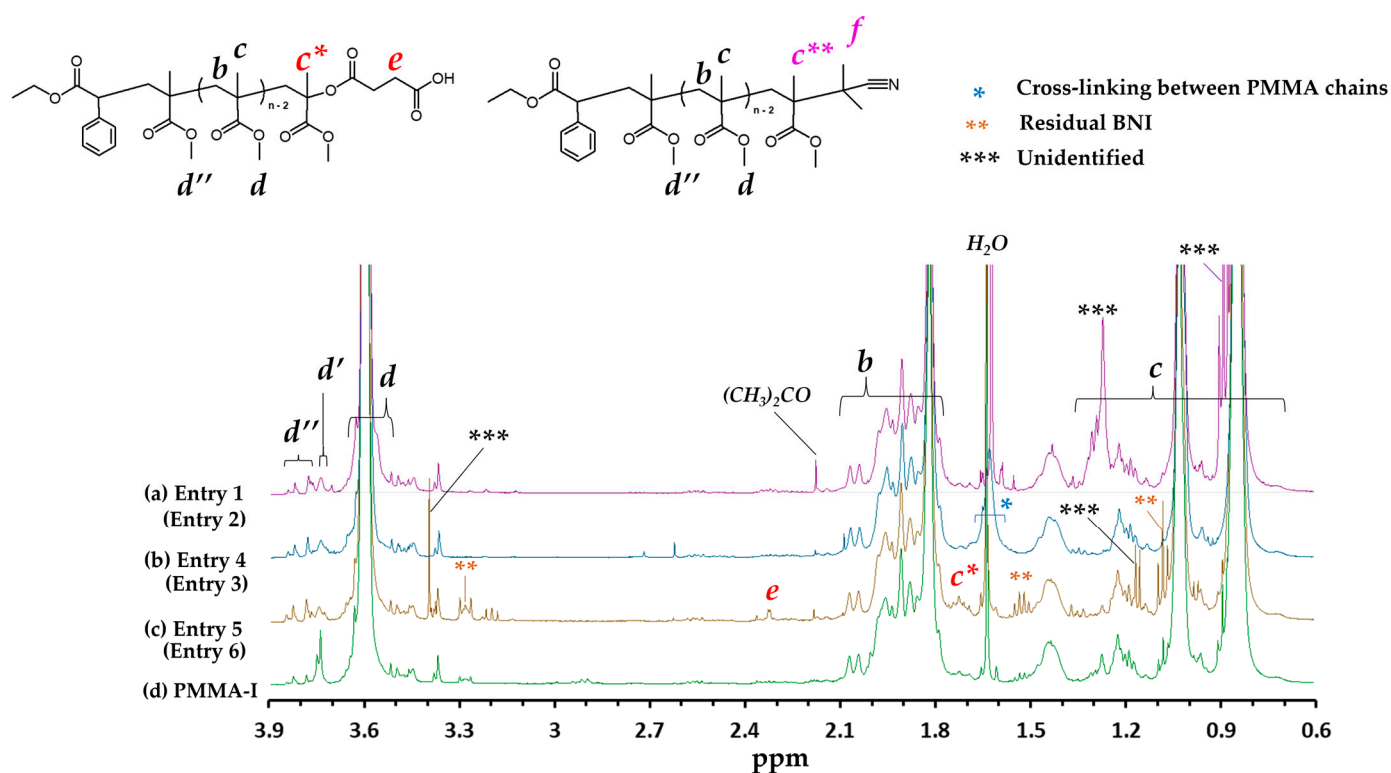

**Figure S5.**  $^1\text{H}$ -NMR spectra of PMMAs modified with (a) only azo compound AIBN (Entry 1), (b) only diacyl peroxide SAPO (Entry 4), (c) combination of SAPO and iodine abstraction catalyst BNI (Entry 5), and (d) precursor PMMA-I.

**Table S1.** Combination ratio for radicals ( $\text{R}\cdot$ ) produced by decomposition of radical generating agent (R-R) to PhE-I radical ( $\text{PhE}\cdot$ ).

| Radical generating agent (R-R) |         |                                                       | Combination ratio<br>between $\text{R}\cdot$ and $\text{PhE}\cdot$<br>[%] <sup>a</sup> |
|--------------------------------|---------|-------------------------------------------------------|----------------------------------------------------------------------------------------|
| Type                           | Abbrev. | Structure of<br>generated radical ( $\text{R}\cdot$ ) |                                                                                        |
| Azo compound                   | AIBN    |                                                       | 18                                                                                     |
| Diacyl peroxide                | LPO     |                                                       | 100                                                                                    |
|                                | BPO     |                                                       | 100                                                                                    |

<sup>a</sup> combination ratio for  $\text{R}\cdot$  and  $\text{PhE}\cdot$  was calculated by integrating the peak corresponding to  $\text{PhE-R}$  generated by combination of  $\text{PhE}\cdot$  and  $\text{R}\cdot$

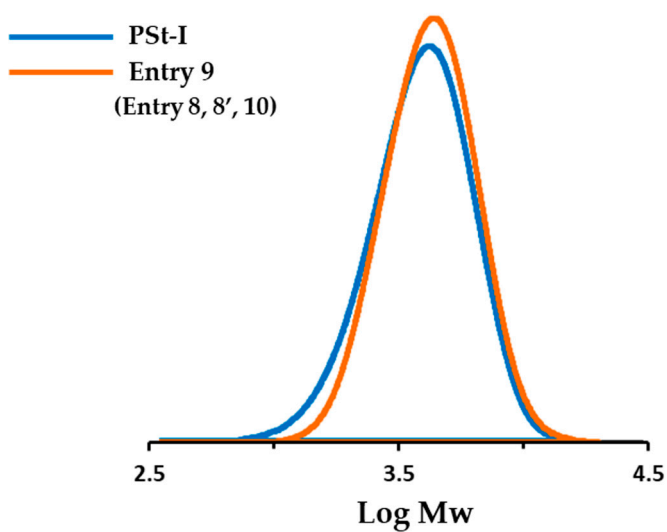

Figure S6. SEC chromatograms before and after chain-end modification for Entry 9.

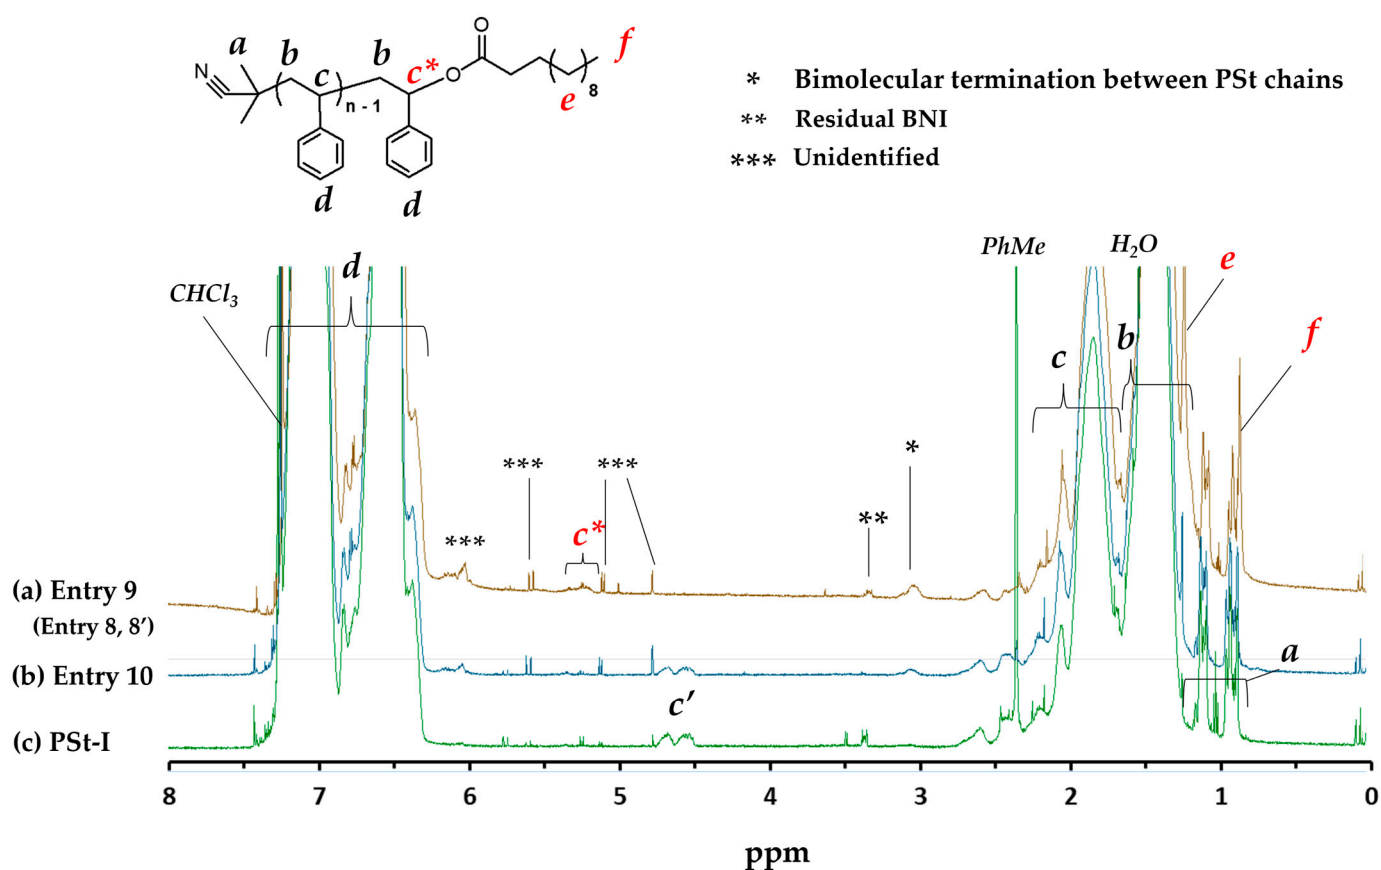

Figure S7.  $^1\text{H}$ -NMR spectra of PSt modified with (a) BNBr (Entry 9), (b) BSI (Entry 10), and (c) precursor PSt-I.

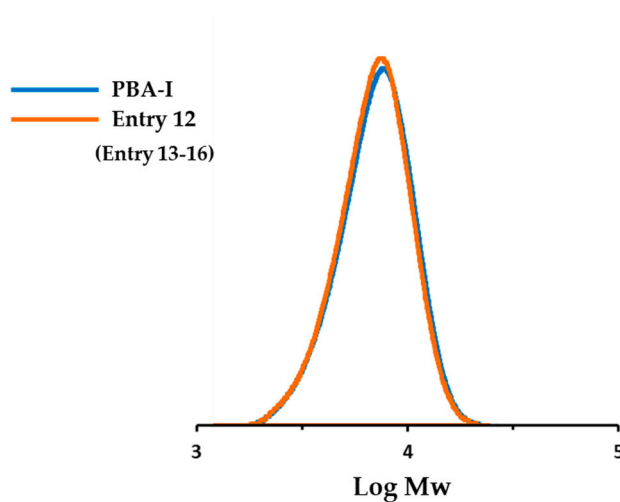

Figure S8. SEC chromatograms before and after chain-end modification for Entry 12.

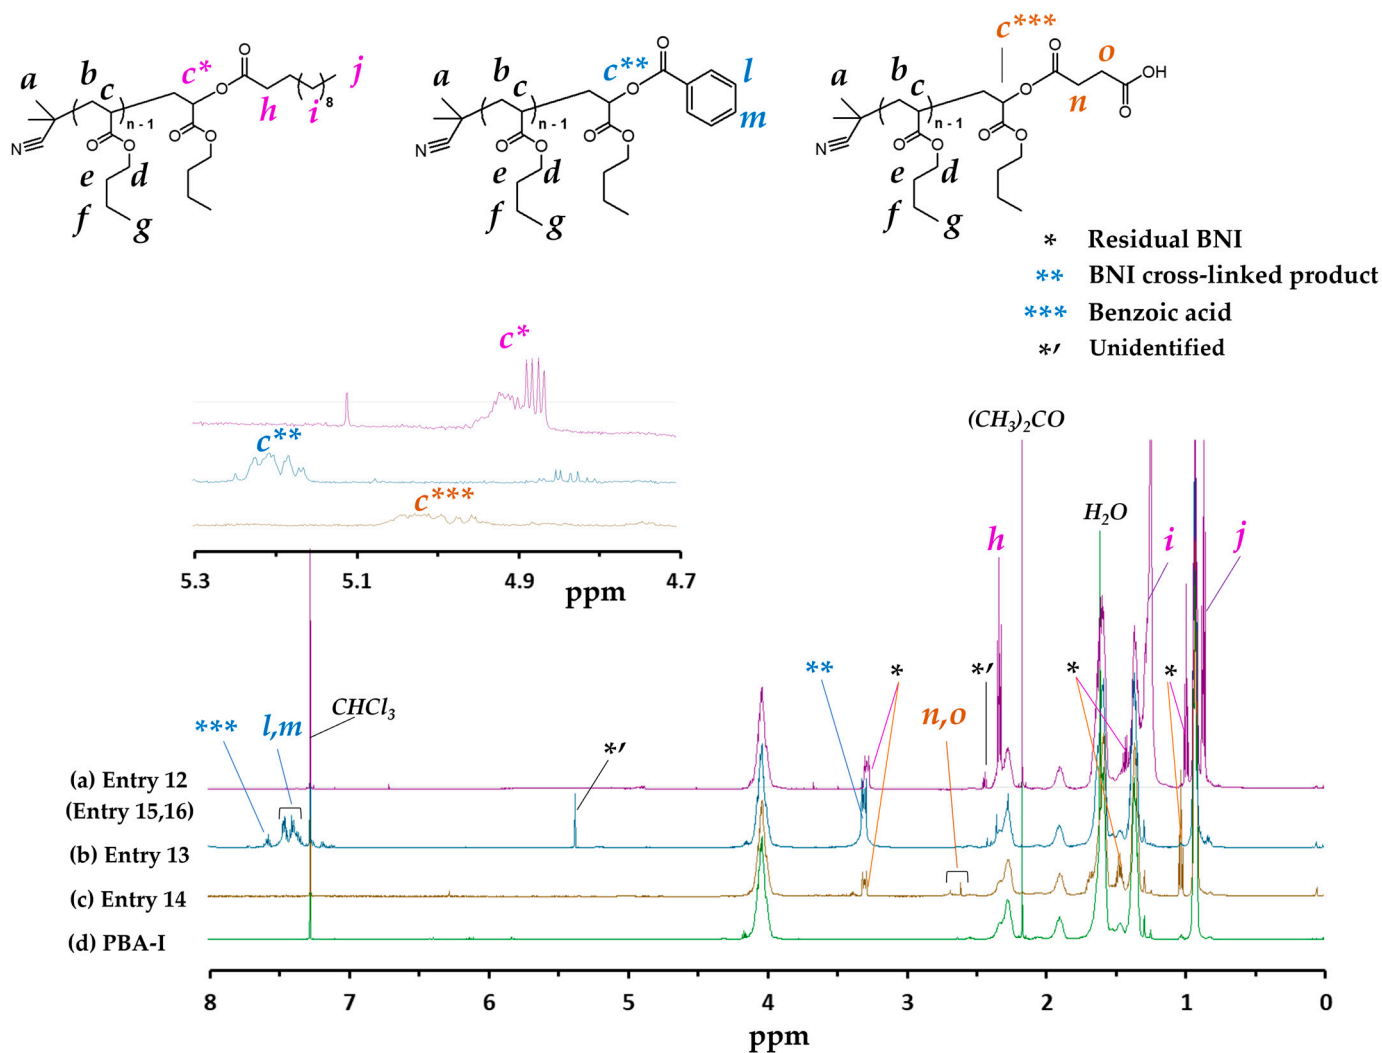

Figure S9.  $^1\text{H}$ -NMR spectra of PBAs modified with different diacyl peroxides; (a) LPO (Entry 9), (b) BPO (Entry 13) and (c) SAPO (Entry 14), (d) precursor PBA-I.
